# Supplementary material
Source: HighWire-hosted journal article supplement (https://oem.bmj.com/content/74/3/176)
Supplement: inline-supplementary-material-1 [file inline-supplementary-material-1.pdf]

## Supplementary Tables

**Table S1:** Odds ratios for self-reported health transitions from multinomial logistic models (GAZEL cohort, men, n=13393)

|                                                                             | Healthy to unhealthy<br>OR (95% CI)* | Unhealthy to healthy<br>OR (95% CI)* | Healthy to death<br>OR (95% CI)* | Unhealthy to death<br>OR (95% CI)* |
|-----------------------------------------------------------------------------|--------------------------------------|--------------------------------------|----------------------------------|------------------------------------|
| <b>Perceived ergonomic strain (1989/90)</b>                                 |                                      |                                      |                                  |                                    |
| No exposure                                                                 | 1.00                                 | 1.00                                 | 1.00                             | 1.00                               |
| Exposed, median or less                                                     | 1.13 (1.09; 1.18)                    | .94 (.89; .99)                       | .94 (.77; 1.14)                  | .87 (.71; 1.05)                    |
| Exposed, over median                                                        | 1.23 (1.18; 1.29)                    | .95 (.90; 1.01)                      | 1.06 (.86; 1.31)                 | .87 (.71; 1.08)                    |
| <b>Perceived physical strain (1989/90)</b>                                  |                                      |                                      |                                  |                                    |
| Median or less                                                              | 1.00                                 | 1.00                                 | 1.00                             | 1.00                               |
| Over median                                                                 | 1.25 (1.20; 1.29)                    | .83 (.80; .87)                       | 1.20 (1.01; 1.42)                | .86 (.73; 1.01)                    |
| <b>Perceived physical danger (1989/90)</b>                                  |                                      |                                      |                                  |                                    |
| No exposure                                                                 | 1.00                                 | 1.00                                 | 1.00                             | 1.00                               |
| Exposed, median or less                                                     | 1.09 (1.04; 1.15)                    | 1.14 (1.07; 1.21)                    | .89 (.72; 1.10)                  | .94 (.76; 1.16)                    |
| Exposed, over median                                                        | 1.13 (1.08; 1.19)                    | 1.12 (1.06; 1.20)                    | .76 (.60; .95)                   | .85 (.67; 1.07)                    |
| <b>Rotating shifts involving night working (1989/90)</b>                    |                                      |                                      |                                  |                                    |
| Never or occasionally                                                       | 1.00                                 | 1.00                                 | 1.00                             | 1.00                               |
| Regularly                                                                   | .87 (.80; .94)                       | 1.00 (.90; 1.11)                     | 1.37 (1.00; 1.89)                | 1.29 (.91; 1.85)                   |
| <b>Number of episodes of absence due to industrial injuries (1978–2009)</b> |                                      |                                      |                                  |                                    |
| None                                                                        | 1.00                                 | 1.00                                 | 1.00                             | 1.00                               |
| One                                                                         | 1.16 (1.10; 1.22)                    | .89 (.83; .95)                       | 1.43 (1.14; 1.78)                | .91 (.72; 1.15)                    |
| Two or more                                                                 | 1.32 (1.22; 1.42)                    | .74 (.67; .80)                       | 1.03 (.71; 1.50)                 | .69 (.50; .97)                     |
| <b>Accumulated chemical exposures (1956–1998)</b>                           |                                      |                                      |                                  |                                    |
| No exposure                                                                 | 1.00                                 | 1.00                                 | 1.00                             | 1.00                               |
| Exposed, median or less                                                     | .94 (.90; .99)                       | 1.05 (.99; 1.11)                     | 1.10 (.90; 1.35)                 | .83 (.68; 1.01)                    |
| Exposed, over median                                                        | .99 (.95; 1.04)                      | 1.11 (1.05; 1.18)                    | 1.03 (.82; 1.29)                 | .81 (.65; 1.01)                    |

\*Adjusted for social class and job grade.

**Table S2:** Odds ratios for chronic condition transitions from multinomial logistic models (GAZEL cohort, men, n=13393)

|                                                                      | Healthy to<br>unhealthy<br>OR (95% CI)* | Healthy to death<br>OR (95% CI)* | Unhealthy to<br>death<br>OR (95% CI)* |
|----------------------------------------------------------------------|-----------------------------------------|----------------------------------|---------------------------------------|
| Perceived ergonomic strain (1989/90)                                 |                                         |                                  |                                       |
| No exposure                                                          | 1.00                                    | 1.00                             | 1.00                                  |
| Exposed, median or less                                              | 1.01 (.95; 1.09)                        | .94 (.71; 1.24)                  | .95 (.81; 1.11)                       |
| Exposed, over median                                                 | 1.03 (.95; 1.13)                        | 1.22 (.90; 1.67)                 | .97 (.82; 1.15)                       |
| Perceived physical strain (1989/90)                                  |                                         |                                  |                                       |
| Median or less                                                       | 1.00                                    | 1.00                             | 1.00                                  |
| Over median                                                          | 1.05 (.98; 1.12)                        | 1.26 (.99; 1.60)                 | 1.10 (.97; 1.26)                      |
| Perceived physical danger (1989/90)                                  |                                         |                                  |                                       |
| No exposure                                                          | 1.00                                    | 1.00                             | 1.00                                  |
| Exposed, median or less                                              | 1.03 (.95; 1.12)                        | .89 (.66; 1.20)                  | .89 (.74; 1.05)                       |
| Exposed, over median                                                 | 1.05 (.96; 1.15)                        | .79 (.57; 1.11)                  | .78 (.65; .94)                        |
| Rotating shifts involving night working (1989/90)                    |                                         |                                  |                                       |
| Never or occasionally                                                | 1.00                                    | 1.00                             | 1.00                                  |
| Regularly                                                            | .87 (.76; 1.00)                         | 1.16 (.73; 1.85)                 | 1.32 (1.00; 1.73)                     |
| Number of episodes of absence due to industrial injuries (1978–2009) |                                         |                                  |                                       |
| None                                                                 | 1.00                                    | 1.00                             | 1.00                                  |
| One                                                                  | 1.13 (1.02; 1.26)                       | 1.63 (1.15; 2.29)                | 1.12 (.93; 1.34)                      |
| Two or more                                                          | 1.34 (1.14; 1.58)                       | 1.15 (.60; 2.20)                 | .94 (.71; 1.23)                       |
| Accumulated chemical exposures (1956–1998)                           |                                         |                                  |                                       |
| No exposure                                                          | 1.00                                    | 1.00                             | 1.00                                  |
| Exposed, median or less                                              | .99 (.92; 1.06)                         | .98 (.74; 1.29)                  | .90 (.77; 1.06)                       |
| Exposed, over median                                                 | 1.06 (.98; 1.16)                        | .75 (.54; 1.06)                  | .90 (.75; 1.07)                       |

\*Adjusted for social class and job grade.
